# Supplementary material for: NKG2C+ memory-like NK cells contribute to the control of HIV viremia during primary infection: Optiprim-ANRS 147
Source: PubMed Central journal article supplement (PMC5539415; doi:10.1038/cti.2017.22), 2017-07-07
Supplement: cti201722x1.pdf [file cti201722x1.pdf]

## Supplementary Information S1

### **Multi-parametric cytometry panels**

NK panel: NKG2A-PacBlue (clone Z199, home-made), live-dead Aqua (Life Technology, 1/200), CD57-FITC (Beckman-Coulter, 1/30), NKG2C-PE (R&D, 1/40), CD14-PC5 (Beckman-Coulter, 1/30), CD19-PC5 (Beckman-Coulter, 1/30), CD56-PC7 (Beckman-Coulter; 1/30), CD3-AF700 (BD Biosciences, 1/40), CD16-APC-H7 (BD Biosciences, 1/40).

DC panel: live-dead Aqua (Life Technology, 1/200), BDCA2-FITC (Miltényi, 1/30), CD123-PerCPy5.5 (BD Biosciences, 1/20), HLA-DR-ECD (Beckmann-Coulter, 1/40), CD3-PC5 (BD Biosciences, 1/40), CD56-PC5 (Beckman Coulter, 1/30), CD19-PC5 (Beckman Coulter, 1/40), CD33-PC7 (BD Biosciences, 1/40), PDL-1-AF647 (clone 3.1, home-made coupling), CD14-APCH7 (BD Biosciences, 1/40), CD16-AF700 (BD Biosciences, 1/40). PDL-1 staining was controlled in a parallel tube containing isotypic control IgG1-AF647.

NK cells degranulation panel: CD107a-FITC (BD Biosciences, 1/20), CD56-PC7 (Beckmann-Coulter, 1/30), CD3-V450 (BD Biosciences, 1/40), live-dead Aqua (Life Technology, 1/200), and CD16-AF700 (BD Biosciences, 1/40). NK cells were gated as live CD3-CD56<sup>+</sup>CD16<sup>+/-</sup>. A control consisting of PBMC incubated without CD107 was used to set the gates for CD107 quantification.

## Supplementary Figure S2

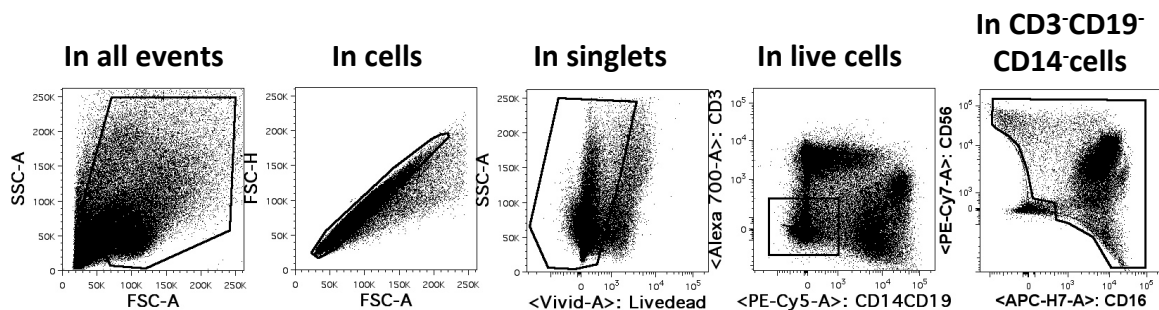

**Manual gating of NK cells within patients PBMC.** Left to right: exclusion of debris, doublets, dead cells and CD3<sup>+</sup>CD19<sup>+</sup>CD14<sup>+</sup> populations. NK cells are gated as CD56<sup>+</sup>CD16<sup>+</sup>, CD56<sup>+</sup>CD16<sup>-</sup> or CD56<sup>-</sup>CD16<sup>+</sup> cells.

### Supplementary Figure S3

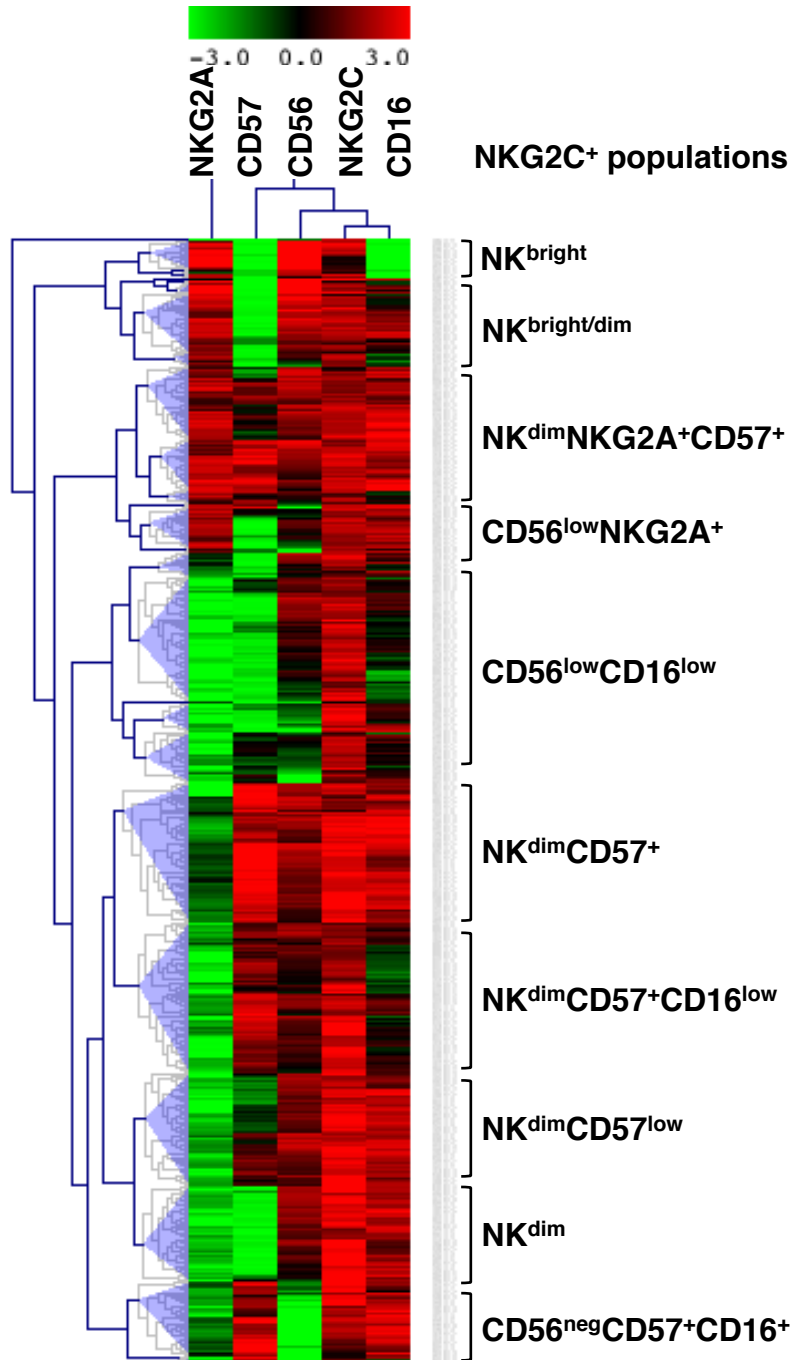

**Identification of NKG2C<sup>+</sup> NK cells subsets within patients samples.** Visualization of the 507 NKG2C<sup>+</sup> clusters computed into the NK cells files from the 30 T0 patients samples in a MeV heatmap. The clusters are visualized and merged according to their normalized MFI for the 5 markers shown on top using the MeV software HCL tools. NK populations are defined as groups of merged clusters and annotated according to their signatures shown on the right.

## Supplementary Table S4

### Percentages of NKG2C<sup>+</sup> sub-populations within total NK cells of patients

| pt id | Nkbright | Nbright/dim | NKdim2a+57+ | CD56lo2a+ | CD56lo16lo | NKdim57+ | NKdim57+16lo | NKdim57lo | Nkdim | CD56neg57+16+ |
|-------|----------|-------------|-------------|-----------|------------|----------|--------------|-----------|-------|---------------|
| 1     | 0,00     | 0,00        | 1,66        | 5,01      | 6,79       | 2,62     | 0,92         | 4,43      | 17,67 | 0,00          |
| 2     | 0,00     | 0,00        | 0,41        | 0,00      | 0,00       | 25,45    | 14,61        | 0,00      | 7,98  | 4,55          |
| 3     | 0,89     | 0,00        | 0,36        | 1,31      | 0,00       | 1,85     | 2,09         | 1,98      | 18,61 | 0,00          |
| 4     | 0,00     | 0,00        | 0,58        | 1,11      | 0,00       | 11,18    | 0,00         | 1,65      | 2,38  | 1,30          |
| 5     | 5,14     | 4,76        | 2,43        | 0,00      | 0,00       | 0,00     | 4,96         | 0,00      | 8,81  | 0,00          |
| 6     | 3,88     | 0,00        | 0,68        | 4,37      | 0,00       | 0,00     | 0,00         | 0,55      | 14,81 | 0,00          |
| 7     | 0,00     | 0,00        | 0,00        | 0,00      | 0,00       | 0,00     | 0,00         | 0,00      | 0,00  | 0,00          |
| 8     | 0,00     | 2,81        | 0,00        | 0,00      | 0,00       | 0,00     | 0,00         | 1,10      | 4,95  | 0,00          |
| 10    | 0,00     | 0,00        | 0,60        | 1,89      | 1,44       | 2,56     | 0,00         | 2,47      | 16,74 | 0,00          |
| 11    | 7,06     | 0,00        | 0,00        | 3,65      | 0,00       | 1,53     | 0,00         | 0,00      | 14,76 | 0,00          |
| 12    | 0,00     | 0,00        | 0,80        | 1,10      | 0,00       | 3,62     | 0,00         | 5,96      | 16,27 | 0,95          |
| 13    | 0,00     | 0,00        | 0,95        | 7,46      | 0,00       | 0,00     | 0,00         | 3,83      | 28,46 | 0,00          |
| 14    | 0,00     | 0,00        | 0,00        | 0,00      | 0,00       | 9,14     | 15,99        | 0,00      | 14,47 | 0,00          |
| 15    | 0,00     | 0,00        | 0,00        | 0,00      | 0,00       | 8,58     | 0,00         | 0,00      | 4,42  | 0,00          |
| 16    | 0,00     | 0,00        | 0,78        | 4,47      | 0,00       | 0,00     | 0,00         | 2,50      | 12,55 | 0,00          |
| 18    | 0,00     | 0,00        | 1,42        | 0,00      | 0,00       | 13,48    | 0,84         | 2,78      | 9,16  | 1,32          |
| 19    | 0,00     | 0,00        | 4,01        | 0,00      | 1,90       | 4,73     | 9,37         | 4,00      | 8,47  | 3,32          |
| 20    | 0,00     | 0,00        | 0,28        | 7,12      | 15,69      | 0,00     | 0,00         | 0,00      | 0,00  | 16,41         |
| 21    | 0,00     | 0,00        | 4,38        | 1,69      | 0,00       | 25,25    | 4,03         | 6,29      | 6,14  | 5,42          |
| 22    | 0,00     | 0,00        | 0,94        | 0,00      | 0,00       | 0,60     | 0,00         | 0,00      | 7,28  | 0,00          |
| 23    | 0,00     | 0,00        | 0,65        | 0,60      | 0,00       | 0,00     | 0,00         | 0,00      | 7,13  | 0,00          |
| 24    | 2,91     | 0,00        | 0,63        | 1,77      | 7,73       | 3,89     | 0,99         | 5,48      | 9,25  | 1,84          |
| 25    | 0,00     | 0,00        | 1,84        | 0,00      | 0,00       | 8,18     | 2,34         | 7,28      | 7,54  | 2,73          |
| 26    | 0,00     | 0,00        | 0,96        | 4,07      | 2,01       | 0,00     | 0,00         | 0,00      | 18,86 | 0,00          |
| 27    | 0,00     | 0,00        | 0,54        | 1,10      | 0,00       | 5,31     | 0,00         | 2,12      | 8,91  | 0,63          |
| 28    | 3,72     | 0,00        | 0,00        | 4,09      | 4,83       | 0,00     | 0,00         | 0,00      | 6,40  | 0,00          |
| 29    | 0,00     | 0,00        | 1,58        | 0,00      | 0,00       | 18,30    | 6,25         | 0,00      | 6,03  | 2,84          |
| 30    | 0,00     | 0,85        | 1,90        | 2,04      | 0,00       | 0,00     | 0,00         | 1,43      | 10,68 | 0,00          |

## Supplementary Figure S5

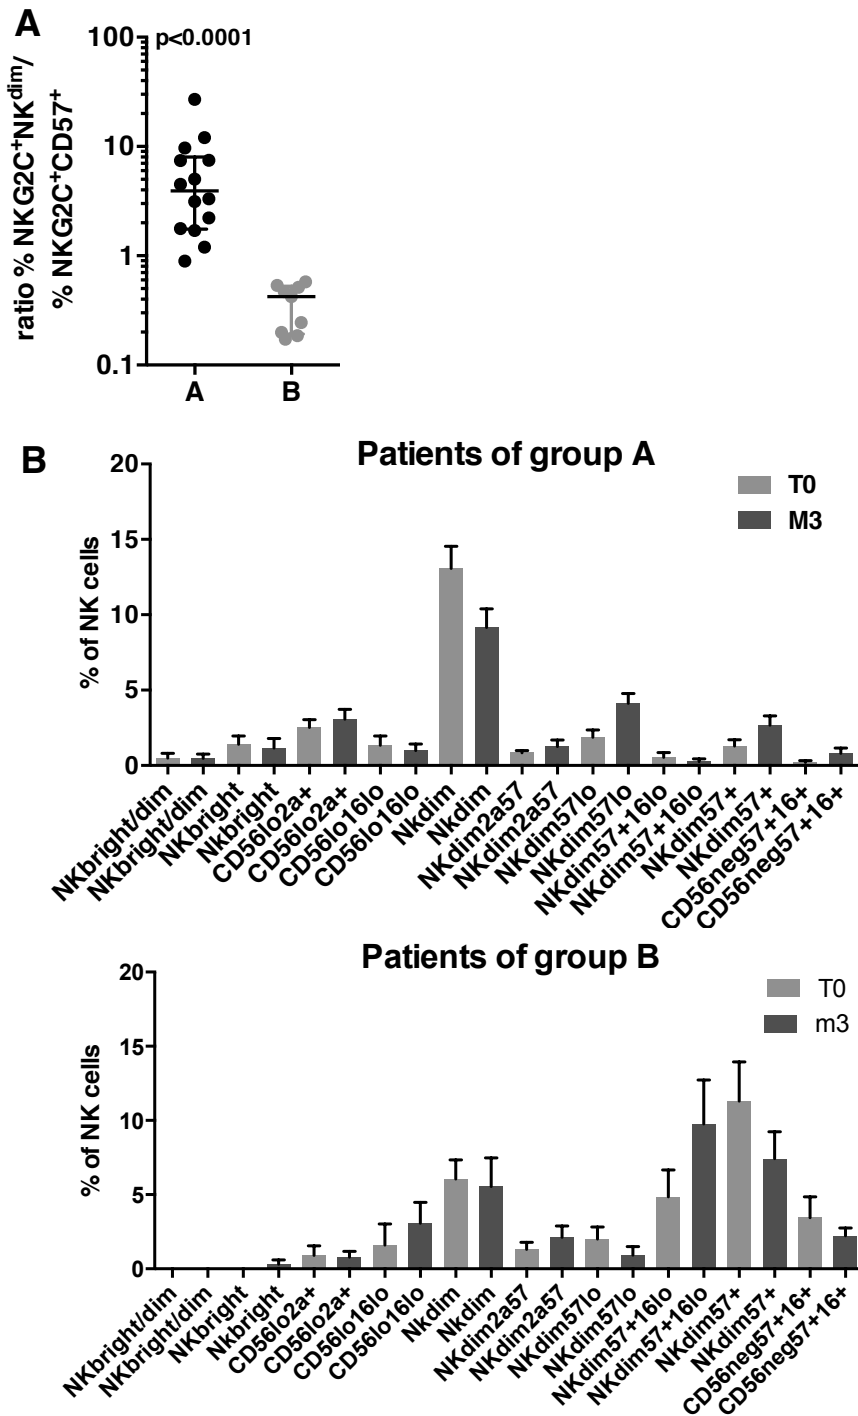

**NKG2C<sup>+</sup> profiles are significantly different between A and B and stable over the 3 months of cART**

(A) Ratio of effector NKG2C<sup>+</sup>NK<sup>dim</sup> to memory-like NKG2C<sup>+</sup>CD57<sup>+</sup> in groups A and B at T0. P-value from Mann-Whitney test is indicated on top.

(B) Modifications of the percentages of each of the 10 NKG2C<sup>+</sup> subsets between T0 and M3 in groups A and B. None of the pairs T0-M3 are significantly different (Friedmann test).

## Supplementary Figure S6

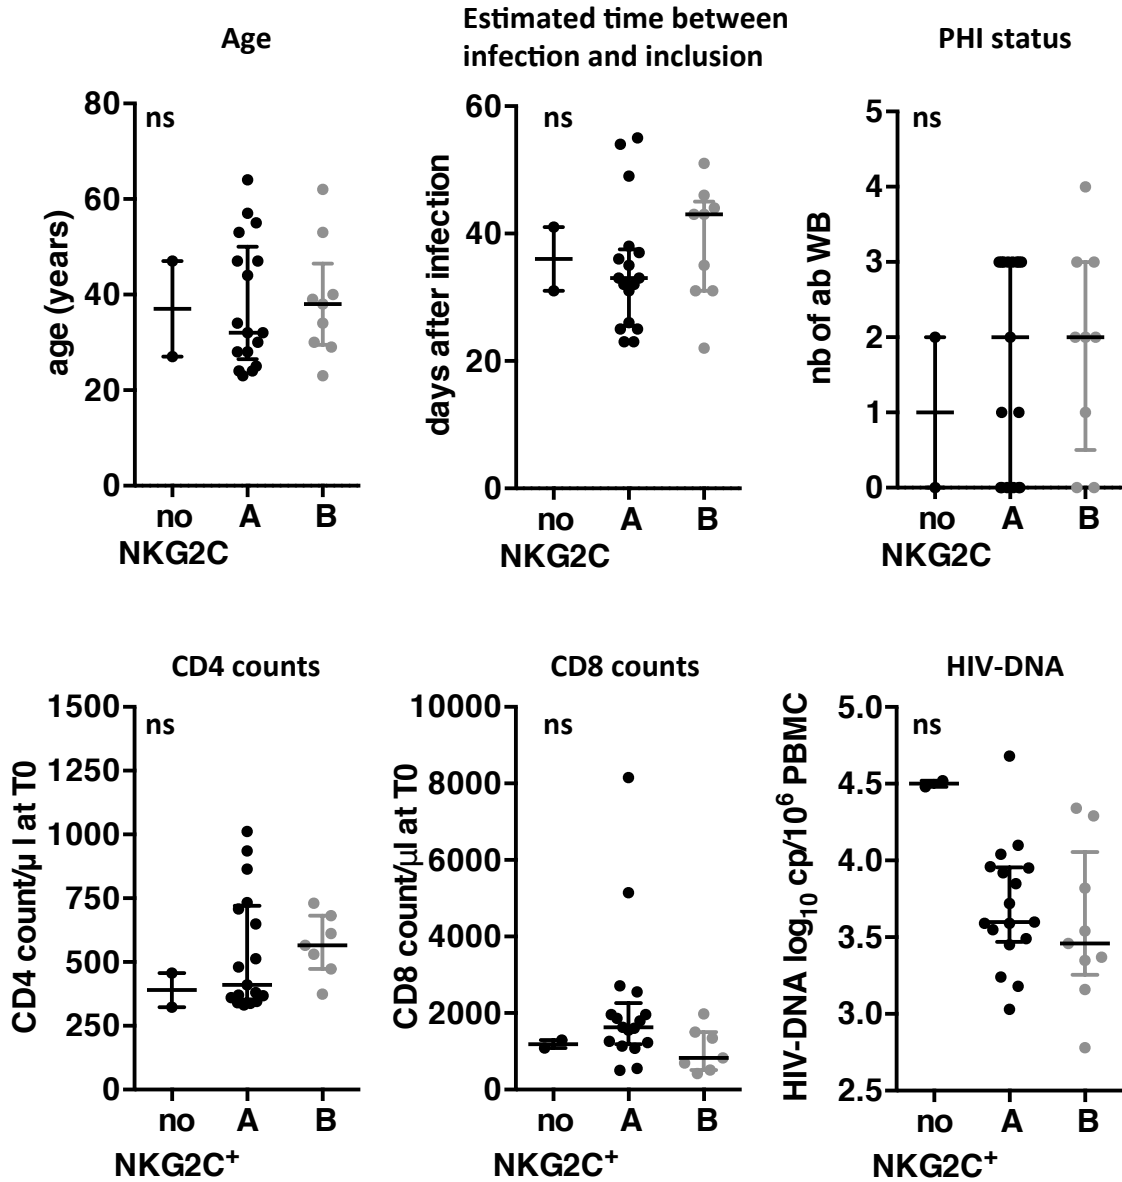

### Clinical and virological parameters in patients groups at T0

Age, days after infection, PHI status estimated by the number of band on Western Blots, CD4 counts, CD8 counts and HIV-DNA in patients groups at T0. P-values from Kruskal-Wallis test is indicated on top of groups.
